# Supplementary material
Source: MDPI journal article supplement (https://www.mdpi.com/2304-6740/3/4/429)

# checkCIF/PLATON report

Structure factors have been supplied for datablock(s) ip407

THIS REPORT IS FOR GUIDANCE ONLY. IF USED AS PART OF A REVIEW PROCEDURE FOR PUBLICATION, IT SHOULD NOT REPLACE THE EXPERTISE OF AN EXPERIENCED CRYSTALLOGRAPHIC REFEREE.

No syntax errors found.      CIF dictionary      Interpreting this report

## Datablock: ip407

---

|                 |                       |                                   |
|-----------------|-----------------------|-----------------------------------|
| Bond precision: | C-C = 0.0117 Å        | Wavelength=0.71073                |
| Cell:           | a=10.049(2)           | b=11.337(2)      c=14.471(3)      |
|                 | alpha=82.53(3)        | beta=83.02(3)      gamma=73.74(3) |
| Temperature:    | 153 K                 |                                   |
|                 | Calculated            | Reported                          |
| Volume          | 1563.0(6)             | 1562.9(5)                         |
| Space group     | P -1                  | P-1                               |
| Hall group      | -P 1                  | ?                                 |
| Moiety formula  | C56 H92 Cl2 N8 Nd2 O2 | ?                                 |
| Sum formula     | C56 H92 Cl2 N8 Nd2 O2 | C56 H92 Cl2 N8 Nd2 O2             |
| Mr              | 1268.76               | 1268.76                           |
| Dx,g cm-3       | 1.348                 | 1.348                             |
| Z               | 1                     | 1                                 |
| Mu (mm-1)       | 1.771                 | 1.771                             |
| F000            | 654.0                 | 654.0                             |
| F000'           | 654.06                |                                   |
| h,k,lmax        | 13,15,19              | 13,15,19                          |
| Nref            | 8448                  | 8340                              |
| Tmin,Tmax       |                       | 0.318,0.334                       |
| Tmin'           |                       |                                   |

Correction method= SPHERE

Data completeness= 0.987      Theta(max)= 29.170

R(reflections)= 0.0547( 8022)      wR2(reflections)= 0.1663( 8340)

S = 1.219      Npar= Npar = 324

---

The following ALERTS were generated. Each ALERT has the format  
**test-name\_ALERT\_alert-type\_alert-level.**  
Click on the hyperlinks for more details of the test.

---

### 🟡 Alert level B

|                   |                              |            |    |            |
|-------------------|------------------------------|------------|----|------------|
| PLAT971_ALERT_2_B | Check Calcd Residual Density | 0.82A From | Nd | 3.45 eA-3  |
| PLAT971_ALERT_2_B | Check Calcd Residual Density | 0.97A From | Nd | 3.39 eA-3  |
| PLAT972_ALERT_2_B | Check Calcd Residual Density | 0.78A From | Nd | -2.84 eA-3 |
| PLAT972_ALERT_2_B | Check Calcd Residual Density | 0.85A From | Nd | -2.63 eA-3 |

### 🟡 Alert level C

|                   |                                                  |                                        |            |
|-------------------|--------------------------------------------------|----------------------------------------|------------|
| PLAT220_ALERT_2_C | Large Non-Solvent C                              | Ueq(max)/Ueq(min) Range                | 4.7 Ratio  |
| PLAT241_ALERT_2_C | High                                             | Ueq as Compared to Neighbors for ..... | C25 Check  |
| PLAT242_ALERT_2_C | Low                                              | Ueq as Compared to Neighbors for ..... | C24 Check  |
| PLAT342_ALERT_3_C | Low Bond Precision on C-C Bonds .....            | 0.0117 Ang.                            |            |
| PLAT360_ALERT_2_C | Short C(sp3)-C(sp3) Bond C25 - C26 ...           | 1.43 Ang.                              |            |
| PLAT906_ALERT_3_C | Large K value in the Analysis of Variance .....  | 4.715 Check                            |            |
| PLAT910_ALERT_3_C | Missing # of FCF Reflections Below Th(Min) ..... | 5 Why ?                                |            |
| PLAT911_ALERT_3_C | Missing # FCF Refl Between THmin & STh/L= 0.600  | 63 Why ?                               |            |
| PLAT913_ALERT_3_C | Missing # of Very Strong Reflections in FCF .... | 22 Note                                |            |
| PLAT918_ALERT_3_C | Reflection(s) with I(obs) much smaller I(calc) . | 3 Check                                |            |
| PLAT939_ALERT_3_C | Large Value of Not (SHELXL) Weight Optimized S . | 10.15                                  |            |
| PLAT971_ALERT_2_C | Check Calcd Residual Density                     | 1.27A From O                           | 2.14 eA-3  |
| PLAT971_ALERT_2_C | Check Calcd Residual Density                     | 1.11A From Nd                          | 1.98 eA-3  |
| PLAT971_ALERT_2_C | Check Calcd Residual Density                     | 1.22A From Nd                          | 1.82 eA-3  |
| PLAT971_ALERT_2_C | Check Calcd Residual Density                     | 1.35A From Nd                          | 1.56 eA-3  |
| PLAT972_ALERT_2_C | Check Calcd Residual Density                     | 0.83A From C30                         | -1.87 eA-3 |
| PLAT972_ALERT_2_C | Check Calcd Residual Density                     | 0.76A From Nd                          | -1.78 eA-3 |

### 🟡 Alert level G

|                   |                                                   |                |
|-------------------|---------------------------------------------------|----------------|
| PLAT005_ALERT_5_G | No _iucr_refine_instructions_details in the CIF   | Please Do !    |
| PLAT083_ALERT_2_G | SHELXL Second Parameter in WGHT Unusually Large.  | 14.14 Why ?    |
| PLAT154_ALERT_1_G | The su's on the Cell Angles are Equal .....       | 0.03000 Degree |
| PLAT371_ALERT_2_G | Long C(sp2)-C(sp1) Bond C1 - C2 ...               | 1.44 Ang.      |
| PLAT371_ALERT_2_G | Long C(sp2)-C(sp1) Bond C21 - C22 ...             | 1.46 Ang.      |
| PLAT710_ALERT_4_G | Delete 1-2-3 or 2-3-4 Linear Torsion Angle ... #  | 117 Do !       |
|                   | N2 -C1 -C2 -C3 -63.00 19.00 1.555 1.555 1.555     | 1.555          |
| PLAT710_ALERT_4_G | Delete 1-2-3 or 2-3-4 Linear Torsion Angle ... #  | 118 Do !       |
|                   | N1 -C1 -C2 -C3 111.00 19.00 1.555 1.555 1.555     | 1.555          |
| PLAT710_ALERT_4_G | Delete 1-2-3 or 2-3-4 Linear Torsion Angle ... #  | 119 Do !       |
|                   | ND -C1 -C2 -C3 21.00 19.00 1.555 1.555 1.555      | 1.555          |
| PLAT710_ALERT_4_G | Delete 1-2-3 or 2-3-4 Linear Torsion Angle ... #  | 120 Do !       |
|                   | C1 -C2 -C3 -C4 43.00 84.00 1.555 1.555 1.555      | 1.555          |
| PLAT710_ALERT_4_G | Delete 1-2-3 or 2-3-4 Linear Torsion Angle ... #  | 121 Do !       |
|                   | C2 -C3 -C4 -C6 16.00 0.00 1.555 1.555 1.555       | 1.555          |
| PLAT710_ALERT_4_G | Delete 1-2-3 or 2-3-4 Linear Torsion Angle ... #  | 122 Do !       |
|                   | C2 -C3 -C4 -C5 -93.00 74.00 1.555 1.555 1.555     | 1.555          |
| PLAT710_ALERT_4_G | Delete 1-2-3 or 2-3-4 Linear Torsion Angle ... #  | 165 Do !       |
|                   | N3 -C21 -C22 -C23 18.00 0.00 1.555 1.555 1.555    | 1.555          |
| PLAT710_ALERT_4_G | Delete 1-2-3 or 2-3-4 Linear Torsion Angle ... #  | 166 Do !       |
|                   | N4 -C21 -C22 -C23 1.00 21.00 1.555 1.555 1.555    | 1.555          |
| PLAT710_ALERT_4_G | Delete 1-2-3 or 2-3-4 Linear Torsion Angle ... #  | 167 Do !       |
|                   | ND -C21 -C22 -C23 -84.00 21.00 1.555 1.555 1.555  | 1.555          |
| PLAT710_ALERT_4_G | Delete 1-2-3 or 2-3-4 Linear Torsion Angle ... #  | 168 Do !       |
|                   | C21 -C22 -C23 -C24 35.00 36.00 1.555 1.555 1.555  | 1.555          |
| PLAT710_ALERT_4_G | Delete 1-2-3 or 2-3-4 Linear Torsion Angle ... #  | 169 Do !       |
|                   | C22 -C23 -C24 -C25 1.00 20.00 1.555 1.555 1.555   | 1.555          |
| PLAT710_ALERT_4_G | Delete 1-2-3 or 2-3-4 Linear Torsion Angle ... #  | 170 Do !       |
|                   | C22 -C23 -C24 -C26 -68.00 20.00 1.555 1.555 1.555 | 1.555          |
| PLAT912_ALERT_4_G | Missing # of FCF Reflections Above STh/L= 0.600   | 36 Note        |

0 ALERT level A = Most likely a serious problem - resolve or explain

4 **ALERT level B** = A potentially serious problem, consider carefully  
17 **ALERT level C** = Check. Ensure it is not caused by an omission or oversight  
18 **ALERT level G** = General information/check it is not something unexpected

1 ALERT type 1 CIF construction/syntax error, inconsistent or missing data  
17 ALERT type 2 Indicator that the structure model may be wrong or deficient  
7 ALERT type 3 Indicator that the structure quality may be low  
13 ALERT type 4 Improvement, methodology, query or suggestion  
1 ALERT type 5 Informative message, check

---

It is advisable to attempt to resolve as many as possible of the alerts in all categories. Often the minor alerts point to easily fixed oversights, errors and omissions in your CIF or refinement strategy, so attention to these fine details can be worthwhile. In order to resolve some of the more serious problems it may be necessary to carry out additional measurements or structure refinements. However, the purpose of your study may justify the reported deviations and the more serious of these should normally be commented upon in the discussion or experimental section of a paper or in the "special\_details" fields of the CIF. checkCIF was carefully designed to identify outliers and unusual parameters, but every test has its limitations and alerts that are not important in a particular case may appear. Conversely, the absence of alerts does not guarantee there are no aspects of the results needing attention. It is up to the individual to critically assess their own results and, if necessary, seek expert advice.

### **Publication of your CIF in IUCr journals**

A basic structural check has been run on your CIF. These basic checks will be run on all CIFs submitted for publication in IUCr journals (*Acta Crystallographica*, *Journal of Applied Crystallography*, *Journal of Synchrotron Radiation*); however, if you intend to submit to *Acta Crystallographica Section C* or *E*, you should make sure that full publication checks are run on the final version of your CIF prior to submission.

### **Publication of your CIF in other journals**

Please refer to the *Notes for Authors* of the relevant journal for any special instructions relating to CIF submission.

---

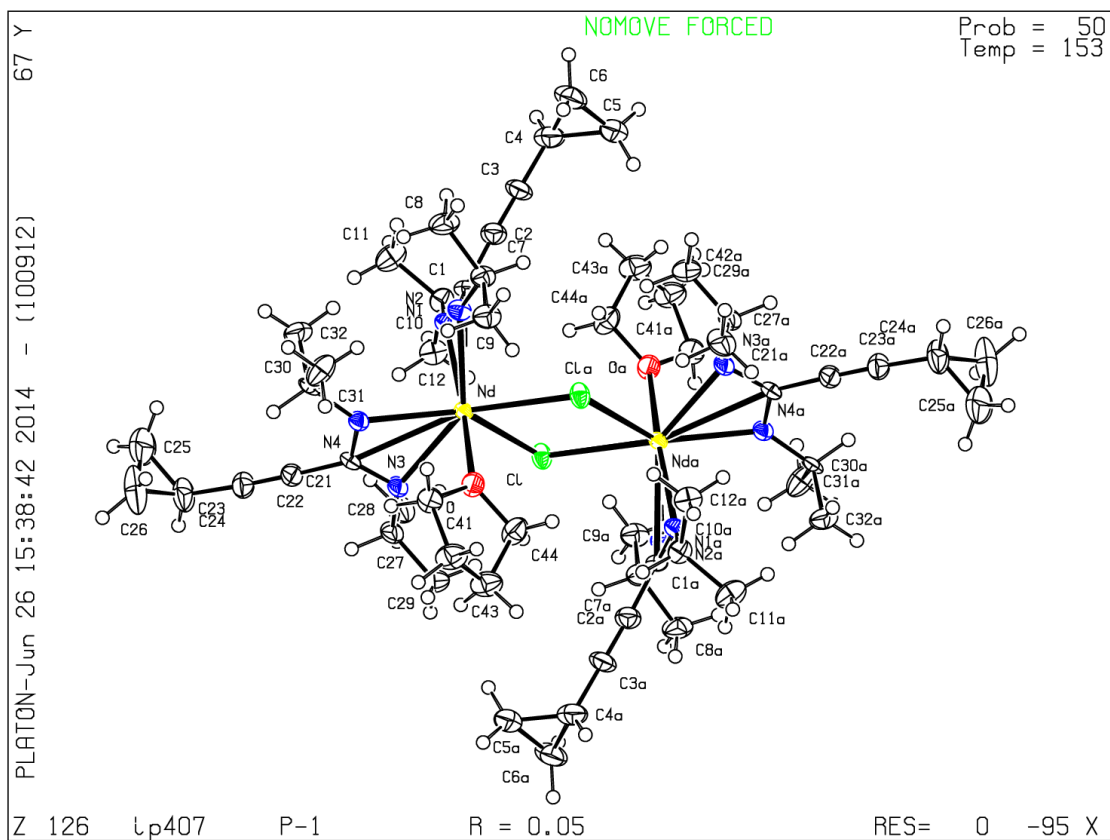

Supplement: s1 [file s1]
