# Supplementary material
Source: MDPI journal article supplement (https://www.mdpi.com/2304-6740/3/4/429)

# checkCIF/PLATON report

Structure factors have been supplied for datablock(s) magd78

THIS REPORT IS FOR GUIDANCE ONLY. IF USED AS PART OF A REVIEW PROCEDURE FOR PUBLICATION, IT SHOULD NOT REPLACE THE EXPERTISE OF AN EXPERIENCED CRYSTALLOGRAPHIC REFEREE.

No syntax errors found.      CIF dictionary      Interpreting this report

## Datablock: magd78

---

Bond precision:    C-C = 0.0016 Å

Wavelength=1.54184

Cell:                a=9.8768(3)                b=10.2082(3)                c=11.6883(4)  
                      alpha=104.144(3)        beta=90.248(3)        gamma=104.209(2)  
Temperature:    100 K

|                | Calculated        | Reported          |
|----------------|-------------------|-------------------|
| Volume         | 1105.18(6)        | 1105.18(6)        |
| Space group    | P -1              | P -1              |
| Hall group     | -P 1              | ?                 |
| Moiety formula | C50 H70 Li2 N4 O2 | ?                 |
| Sum formula    | C50 H70 Li2 N4 O2 | C50 H70 Li2 N4 O2 |
| Mr             | 772.98            | 772.98            |
| Dx,g cm-3      | 1.161             | 1.161             |
| Z              | 1                 | 1                 |
| Mu (mm-1)      | 0.530             | 0.530             |
| F000           | 420.0             | 420.0             |
| F000'          | 421.06            |                   |
| h,k,lmax       | 12,12,14          | 12,12,14          |
| Nref           | 4665              | 4628              |
| Tmin,Tmax      | 0.938,0.948       | 0.939,0.949       |
| Tmin'          | 0.938             |                   |

Correction method= MULTI-SCAN

Data completeness= 0.992

Theta(max)= 76.970

R(reflections)= 0.0392( 4442)

wR2(reflections)= 0.0974( 4628)

S = 1.027

Npar= 262

---

The following ALERTS were generated. Each ALERT has the format  
**test-name\_ALERT\_alert-type\_alert-level.**  
Click on the hyperlinks for more details of the test.

---

## ● Alert level C

CRYSC01\_ALERT\_1\_C The word below has not been recognised as a standard identifier.  
CrysAlisPro,  
CRYSC01\_ALERT\_1\_C The word below has not been recognised as a standard identifier.  
Agilent  
CRYSC01\_ALERT\_1\_C The word below has not been recognised as a standard identifier.  
Technologies,  
CRYSC01\_ALERT\_1\_C The word below has not been recognised as a standard identifier.  
Version  
CRYSC01\_ALERT\_1\_C The word below has not been recognised as a standard identifier.  
1.171.36.28  
CRYSC01\_ALERT\_1\_C The word below has not been recognised as a standard identifier.  
(release  
CRYSC01\_ALERT\_1\_C The word below has not been recognised as a standard identifier.  
01  
CRYSC01\_ALERT\_1\_C The word below has not been recognised as a standard identifier.  
02  
CRYSC01\_ALERT\_1\_C The word below has not been recognised as a standard identifier.  
2013  
CRYSC01\_ALERT\_1\_C The word below has not been recognised as a standard identifier.  
CrysAlis171  
CRYSC01\_ALERT\_1\_C The word below has not been recognised as a standard identifier.  
.NET)  
CRYSC01\_ALERT\_1\_C The word below has not been recognised as a standard identifier.  
(compiled  
CRYSC01\_ALERT\_1\_C The word below has not been recognised as a standard identifier.  
Feb  
CRYSC01\_ALERT\_1\_C The word below has not been recognised as a standard identifier.  
  
CRYSC01\_ALERT\_1\_C The word below has not been recognised as a standard identifier.  
1  
CRYSC01\_ALERT\_1\_C The word below has not been recognised as a standard identifier.  
2013,16:14:44)  
CRYSC01\_ALERT\_1\_C No recognised colour has been given for crystal colour.

---

## ● Alert level G

|                   |                                                |                               |             |
|-------------------|------------------------------------------------|-------------------------------|-------------|
| PLAT005_ALERT_5_G | No _iucr_refine_instructions_details           | in the CIF                    | Please Do ! |
| PLAT066_ALERT_1_G | Predicted and Reported Tmin&Tmax Range         | Identical                     | ? Check     |
| PLAT093_ALERT_1_G | No su's on H-positions, refinement reported as | .                             | mixed       |
| PLAT230_ALERT_2_G | Hirshfeld Test Diff for                        | C1 -- C2 ..                   | 6.7 su      |
| PLAT230_ALERT_2_G | Hirshfeld Test Diff for                        | C3 -- C4 ..                   | 5.5 su      |
| PLAT371_ALERT_2_G | Long C(sp2)-C(sp1) Bond                        | C3 - C4 ...                   | 1.44 Ang.   |
| PLAT710_ALERT_4_G | Delete 1-2-3 or 2-3-4 Linear Torsion Angle ... | #                             | 14 Do !     |
|                   | N1 -C1 -C2 -C3                                 | -41.10 1.30 1.555 1.555 1.555 | 1.555       |

```

PLAT710_ALERT_4_G Delete 1-2-3 or 2-3-4 Linear Torsion Angle ... #      15 Do !
      N2  -C1  -C2  -C3      136.70  1.20  1.555  1.555  1.555  1.555
PLAT710_ALERT_4_G Delete 1-2-3 or 2-3-4 Linear Torsion Angle ... #      16 Do !
      LI  -C1  -C2  -C3     -114.30  1.20  1.555  1.555  1.555  1.555
PLAT710_ALERT_4_G Delete 1-2-3 or 2-3-4 Linear Torsion Angle ... #      17 Do !
      C1  -C2  -C3  -C4       34.00  4.00  1.555  1.555  1.555  1.555
PLAT710_ALERT_4_G Delete 1-2-3 or 2-3-4 Linear Torsion Angle ... #      18 Do !
      C2  -C3  -C4  -C9     -94.00  4.00  1.555  1.555  1.555  1.555
PLAT710_ALERT_4_G Delete 1-2-3 or 2-3-4 Linear Torsion Angle ... #      19 Do !
      C2  -C3  -C4  -C5       86.00  4.00  1.555  1.555  1.555  1.555
PLAT793_ALERT_4_G The Model has Chirality at C1      .....      S Verify
PLAT912_ALERT_4_G Missing # of FCF Reflections Above STh/L= 0.600      37 Note

```

---

```

0 ALERT level A = Most likely a serious problem - resolve or explain
0 ALERT level B = A potentially serious problem, consider carefully
17 ALERT level C = Check. Ensure it is not caused by an omission or oversight
14 ALERT level G = General information/check it is not something unexpected

19 ALERT type 1 CIF construction/syntax error, inconsistent or missing data
3 ALERT type 2 Indicator that the structure model may be wrong or deficient
0 ALERT type 3 Indicator that the structure quality may be low
8 ALERT type 4 Improvement, methodology, query or suggestion
1 ALERT type 5 Informative message, check

```

---

It is advisable to attempt to resolve as many as possible of the alerts in all categories. Often the minor alerts point to easily fixed oversights, errors and omissions in your CIF or refinement strategy, so attention to these fine details can be worthwhile. In order to resolve some of the more serious problems it may be necessary to carry out additional measurements or structure refinements. However, the purpose of your study may justify the reported deviations and the more serious of these should normally be commented upon in the discussion or experimental section of a paper or in the "special\_details" fields of the CIF. checkCIF was carefully designed to identify outliers and unusual parameters, but every test has its limitations and alerts that are not important in a particular case may appear. Conversely, the absence of alerts does not guarantee there are no aspects of the results needing attention. It is up to the individual to critically assess their own results and, if necessary, seek expert advice.

### Publication of your CIF in IUCr journals

A basic structural check has been run on your CIF. These basic checks will be run on all CIFs submitted for publication in IUCr journals (*Acta Crystallographica*, *Journal of Applied Crystallography*, *Journal of Synchrotron Radiation*); however, if you intend to submit to *Acta Crystallographica Section C* or *E*, you should make sure that full publication checks are run on the final version of your CIF prior to submission.

### Publication of your CIF in other journals

Please refer to the *Notes for Authors* of the relevant journal for any special instructions relating to CIF submission.

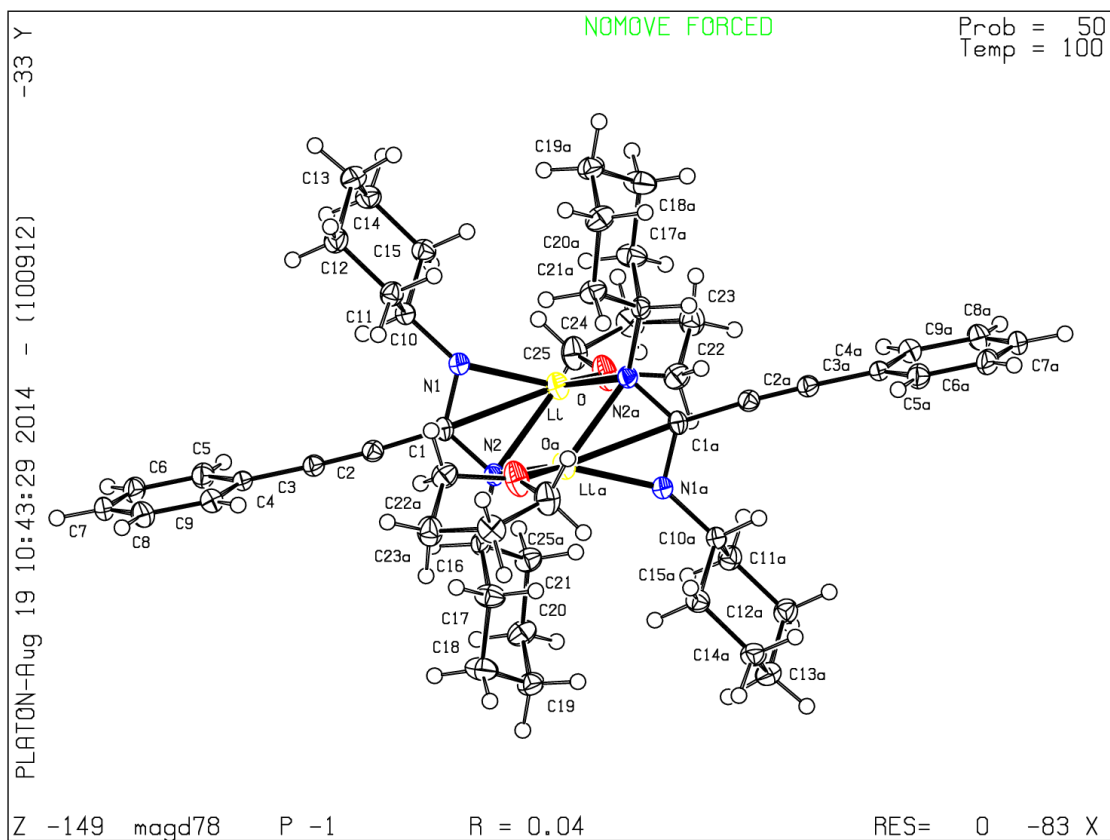

Supplement: s1 [file s1]
