# Supplementary material
Source: MDPI journal article supplement (https://www.mdpi.com/2304-6740/3/4/429)
Supplement: s1 [file s1]

## Supplementary Information

IR data of the new compounds, HSQC spectra of **5** and **6** (Figure S1 and S2), and full crystallographic data for compounds **1**, **2**, **8** and **9** (Tables S1–S8). ORTEP representation of compounds **1**, **2**, **8** and **9** (Figures S3–S6).

### IR data of the new compounds

Li[Ph–C≡C–C(NCy)<sub>2</sub>]·THF (**2**). IR (KBr):  $\nu$  (cm<sup>-1</sup>) 3678 (w), 3438 (w), 3222 (m), 3081 (m), 3033 (m), 2926 (vs), 2852 (s), 2691 (w), 2663 (w), 2587 (w), 2363 (w), 2217 (m, C≡C), 1941 (w), 1891 (w), 1799 (w), 1635 (m), 1610 (vs, NCN), 1492 (vs), 1446 (m), 1388 (m), 1360 (m), 1343 (m), 1311 (m), 1282 (m), 1213 (m), 1181 (m), 1156 (m), 1125 (m), 1101 (m), 1069 (m), 1027 (m), 912 (w), 889 (m), 843 (w), 797 (w), 755 (m), 709 (w), 690 (m), 639 (w), 616 (w), 555 (w), 527 (w), 448 (w), 428 (w).

Li[Ph–C≡C–C(NCy)<sub>2</sub>]·Et<sub>2</sub>O (**3**). IR (KBr):  $\nu$  (cm<sup>-1</sup>) 3676 (w), 3369 (w), 3213 (w), 3059 (m), 2961 (vs), 2865 (s), 2705 (w), 2610 (m), 2360 (w), 2211 (w, C≡C), 2126 (w), 1948 (w), 1879 (w), 1752 (w), 1592 (s, NCN), 1504 (vs), 1442 (s), 1372 (s), 1352 (s), 1323 (vs), 1226 (m), 1175 (s), 1133 (s), 1069 (m), 1051 (s), 1031 (s), 998 (m), 946 (m), 913 (s), 849 (m), 821 (m), 755 (vs), 714 (m), 690 (vs), 630 (w), 543 (m), 528 (s), 515 (m), 476 (w), 453 (w), 435 (w).

[Ph–C≡C–C(NCy)<sub>2</sub>]<sub>3</sub>Ce (**4**). IR (KBr):  $\nu$  (cm<sup>-1</sup>) 3439 (s), 3222 (s), 2973 (s), 2930 (vs), 2855 (w), 2217 (w, C≡C), 1637 (vs, NCN), 1448 (s), 1370 (m), 1309 (w), 1242 (s), 1180 (s), 1153 (s), 1079 (m), 1038 (m), 987 (m), 962 (w), 916 (w), 890 (m), 834 (w), 755 (s), 690 (s), 646 (w), 627 (w), 529 (w), 501 (w), 472 (w).

[Ph–C≡C–C(NCy)<sub>2</sub>]<sub>3</sub>Ho (**7**). IR (KBr):  $\nu$  (cm<sup>-1</sup>) 3671 (w), 3362 (w), 3222 (w), 3063 (m), 2963 (vs), 2868 (s), 2710 (w), 2622 (m), 2363 (w), 2221 (w, C≡C), 2128 (w), 1952 (w), 1882 (w), 1754 (w), 1599 (s, NCN), 1518 (vs), 1452 (s), 1363 (s), 1318 (s), 1229 (m), 1072 (m), 1065 (s), 1036 (s), 999 (m), 949 (m), 854 (m), 822 (m), 758 (vs), 692 (vs), 652 (w), 534 (m), 531 (s), 512 (m), 479 (w), 451 (w).

[Ph<sub>2</sub>P(NSiMe<sub>3</sub>)<sub>2</sub>]<sub>2</sub>Ce(μ-Cl)<sub>2</sub>Li(THF)<sub>2</sub> (**9**). IR (KBr):  $\nu$  (cm<sup>-1</sup>) 3380 (m), 3222 (m), 3075 (s), 2952 (vs), 2897 (s), 2541 (w), 2029 (w), 1959 (w), 1821 (w), 1776 (w), 1638 (s), 1591 (m), 1437 (s), 1306 (s), 1246 (vs), 1154 (m), 1116 (m), 1044 (w), 1028 (w), 998 (m), 933 (m), 841 (s), 776 (m), 748 (s), 695 (s), 661 (w), 576 (w), 555 (w), 530 (s), 505 (m), 451 (w), 435 (w).

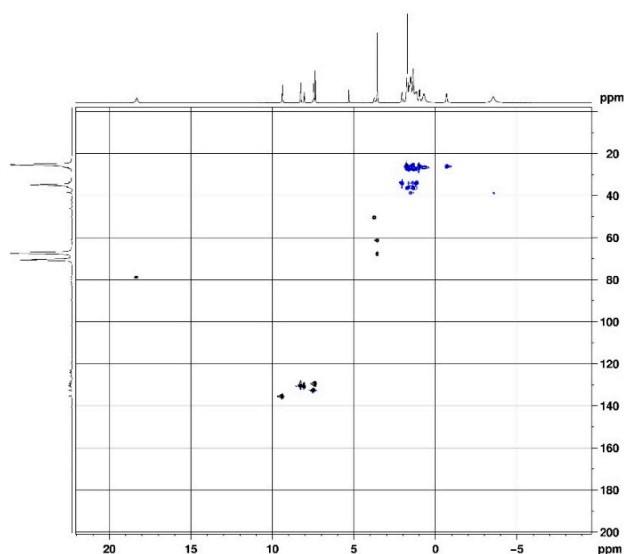

**Figure S1.** HSQC spectrum (400 MHz, THF-*d*<sub>8</sub>, 25 °C) of [Ph–C≡C–C(NCy)<sub>2</sub>]<sub>3</sub>Nd (**5**).

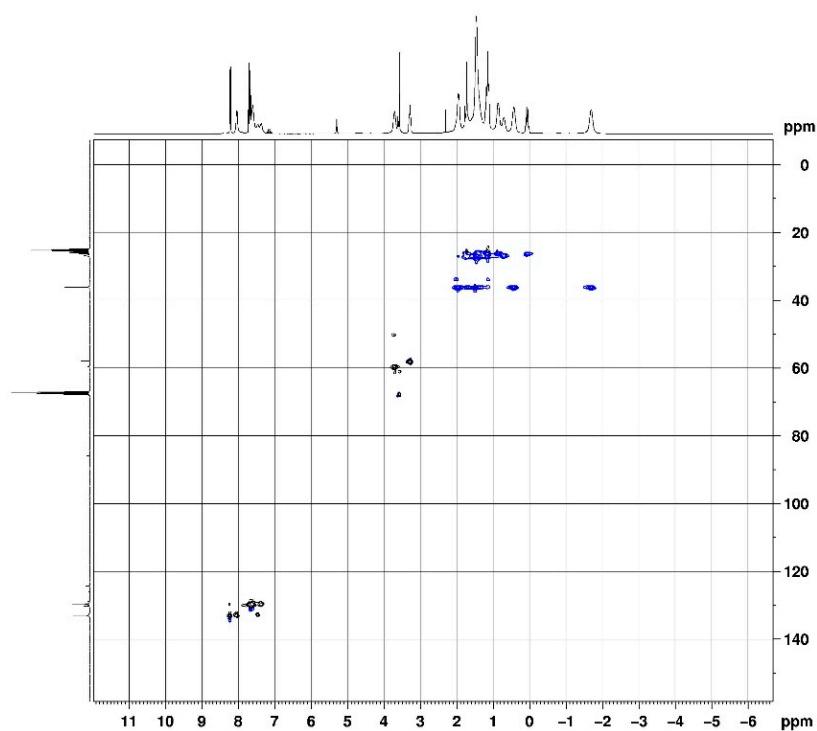

**Figure S2.** HSQC spectrum (400 MHz, THF-*d*<sub>8</sub>, 25 °C) of [Ph-C≡C-C(NCy)<sub>2</sub>]<sub>3</sub>Sm (**6**).

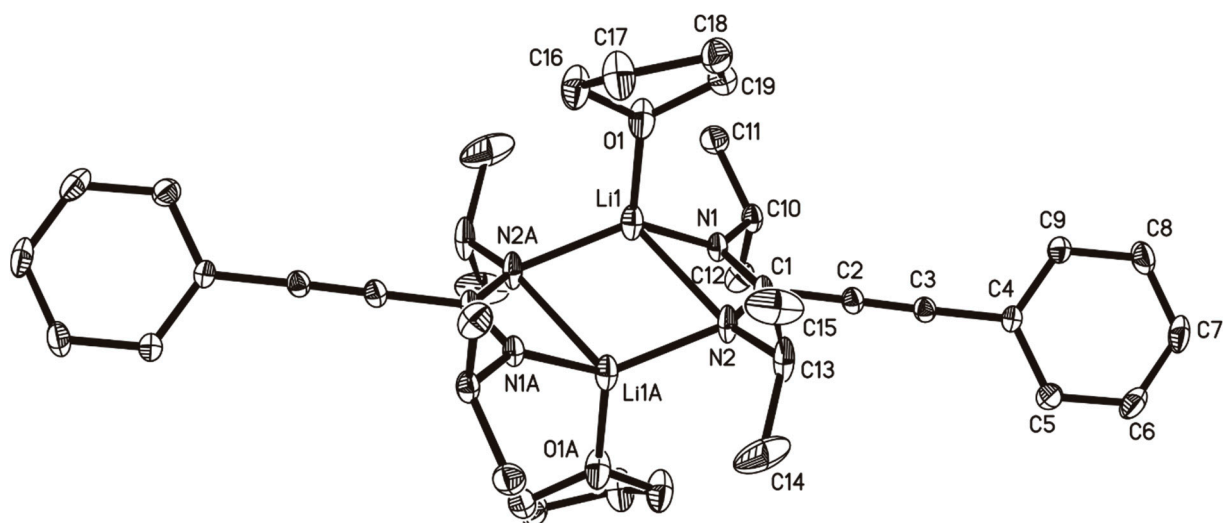

**Figure S3.** ORTEP representation of **1**. Displacement ellipsoids are drawn at the 50% probability level.

**Table S1.** Crystal data and structure refinement for **1**.

|                                        |                                                                                                                                                 |
|----------------------------------------|-------------------------------------------------------------------------------------------------------------------------------------------------|
| Identification code                    | ip276                                                                                                                                           |
| Empirical formula                      | C <sub>38</sub> H <sub>54</sub> Li <sub>2</sub> N <sub>4</sub> O <sub>2</sub>                                                                   |
| Formula weight                         | 612.73                                                                                                                                          |
| Temperature                            | 153(2) K                                                                                                                                        |
| Wavelength                             | 0.71073 Å                                                                                                                                       |
| Crystal system                         | Triclinic                                                                                                                                       |
| Space group                            | P-1                                                                                                                                             |
| Unit cell dimensions                   | $a = 9.6687(19)$ Å; $\alpha = 93.77(3)^\circ$ ;<br>$b = 9.948(2)$ Å; $\beta = 91.33(3)^\circ$ ;<br>$c = 19.611(4)$ Å; $\gamma = 90.96(3)^\circ$ |
| Volume                                 | 1881.3(6) Å <sup>3</sup>                                                                                                                        |
| Z                                      | 2                                                                                                                                               |
| Density (calculated)                   | 1.082 Mg/m <sup>3</sup>                                                                                                                         |
| Absorption coefficient                 | 0.066 mm <sup>-1</sup>                                                                                                                          |
| $F(000)$                               | 664                                                                                                                                             |
| Crystal size                           | 0.60 × 0.60 × 0.40 mm <sup>3</sup>                                                                                                              |
| $\theta$ range for data collection     | 2.05° to 26.37°                                                                                                                                 |
| Index ranges                           | $-11 \leq h \leq 12$ , $-11 \leq k \leq 12$ , $-24 \leq l \leq 24$                                                                              |
| Reflections collected                  | 15,323                                                                                                                                          |
| Independent reflections                | 7395 [R(int) = 0.0399]                                                                                                                          |
| Completeness to $\theta = 26.37^\circ$ | 96.2%                                                                                                                                           |
| Absorption correction                  | None                                                                                                                                            |
| Refinement method                      | Full-matrix least-squares on F <sup>2</sup>                                                                                                     |
| Data/restraints/parameters             | 7395/0/469                                                                                                                                      |
| Goodness-of-fit on F <sup>2</sup>      | 1.013                                                                                                                                           |
| Final R indices [ $I > 2\sigma(I)$ ]   | $R1 = 0.0520$ , $wR2 = 0.1256$                                                                                                                  |
| R indices (all data)                   | $R1 = 0.0782$ , $wR2 = 0.1347$                                                                                                                  |
| Largest difference peak and hole       | 0.406 and $-0.313$ e.Å <sup>-3</sup>                                                                                                            |

**Table S2.** Bond lengths [Å] and angles [°] for **1**.

|                      |            |                   |            |
|----------------------|------------|-------------------|------------|
| O(1)–C(16)           | 1.423(2)   | Li(2)–N(3)#2      | 2.044(3)   |
| O(1)–C(19)           | 1.430(2)   | Li(2)–N(3)        | 2.211(3)   |
| O(1)–Li(1)           | 1.908(3)   | Li(2)–C(21)       | 2.405(3)   |
| Li(1)–N(1)           | 1.990(3)   | Li(2)–Li(2)#2     | 2.478(6)   |
| Li(1)–N(2)#1         | 2.043(3)   | N(3)–C(21)        | 1.3314(19) |
| Li(1)–N(2)           | 2.261(3)   | N(3)–C(30)        | 1.469(2)   |
| Li(1)–C(1)           | 2.413(3)   | N(3)–Li(2)#2      | 2.044(3)   |
| Li(1)–Li(1)#1        | 2.471(6)   | N(4)–C(21)        | 1.319(2)   |
| N(1)–C(1)            | 1.321(2)   | N(4)–C(33)        | 1.4565(19) |
| N(1)–C(10)           | 1.452(2)   | C(21)–C(22)       | 1.464(2)   |
| N(2)–C(1)            | 1.330(2)   | C(22)–C(23)       | 1.196(2)   |
| N(2)–C(13)           | 1.468(2)   | C(23)–C(24)       | 1.434(2)   |
| N(2)–Li(1)#1         | 2.043(3)   | C(24)–C(25)       | 1.385(2)   |
| C(1)–C(2)            | 1.470(2)   | C(24)–C(29)       | 1.397(2)   |
| C(2)–C(3)            | 1.189(2)   | C(25)–C(26)       | 1.385(2)   |
| C(3)–C(4)            | 1.439(2)   | C(26)–C(27)       | 1.377(3)   |
| C(4)–C(9)            | 1.387(2)   | C(27)–C(28)       | 1.371(3)   |
| C(4)–C(5)            | 1.391(2)   | C(28)–C(29)       | 1.382(2)   |
| C(5)–C(6)            | 1.383(2)   | C(30)–C(32)       | 1.514(3)   |
| C(6)–C(7)            | 1.371(3)   | C(30)–C(31)       | 1.517(3)   |
| C(7)–C(8)            | 1.371(3)   | C(33)–C(35)       | 1.515(3)   |
| C(8)–C(9)            | 1.385(2)   | C(33)–C(34)       | 1.516(3)   |
| C(10)–C(11)          | 1.516(2)   | O(2)–C(39)        | 1.442(19)  |
| C(10)–C(12)          | 1.517(2)   | O(2)–C(36)        | 1.445(18)  |
| C(13)–C(15)          | 1.495(3)   | C(36)–C(37)       | 1.574(18)  |
| C(13)–C(14)          | 1.512(4)   | C(37)–C(38)       | 1.398(18)  |
| C(16)–C(17)          | 1.466(3)   | C(38)–C(39)       | 1.390(16)  |
| C(17)–C(18)          | 1.508(3)   | O(2')–C(39')      | 1.43(3)    |
| C(18)–C(19)          | 1.518(3)   | O(2')–C(36')      | 1.44(3)    |
| Li(2)–O(2)           | 1.904(15)  | C(36')–C(37')     | 1.38(2)    |
| Li(2)–O(2')          | 1.93(2)    | C(37')–C(38')     | 1.65(2)    |
| Li(2)–N(4)           | 1.992(3)   | C(38')–C(39')     | 1.75(3)    |
| C(16)–O(1)–C(19)     | 106.94(14) | O(1)–Li(1)–N(2)#1 | 112.16(14) |
| C(16)–O(1)–Li(1)     | 123.29(15) | N(1)–Li(1)–N(2)#1 | 125.99(16) |
| C(19)–O(1)–Li(1)     | 124.94(13) | O(1)–Li(1)–N(2)   | 113.49(14) |
| O(1)–Li(1)–N(1)      | 118.80(16) | N(1)–Li(1)–N(2)   | 64.67(10)  |
| N(2)#1–Li(1)–N(2)    | 110.15(15) | N(2)–C(13)–C(14)  | 110.91(17) |
| O(1)–Li(1)–C(1)      | 114.37(14) | C(15)–C(13)–C(14) | 109.07(19) |
| N(1)–Li(1)–C(1)      | 33.18(7)   | O(1)–C(16)–C(17)  | 105.93(16) |
| N(2)#1–Li(1)–C(1)    | 130.17(16) | C(16)–C(17)–C(18) | 105.37(18) |
| N(2)–Li(1)–C(1)      | 32.85(7)   | C(17)–C(18)–C(19) | 104.23(15) |
| O(1)–Li(1)–Li(1)#1   | 132.6(2)   | O(1)–C(19)–C(18)  | 106.62(15) |
| N(1)–Li(1)–Li(1)#1   | 95.41(17)  | O(2)–Li(2)–O(2')  | 3.3(13)    |
| N(2)#1–Li(1)–Li(1)#1 | 59.23(12)  | O(2)–Li(2)–N(4)   | 118.8(5)   |
| N(2)–Li(1)–Li(1)#1   | 50.92(11)  | O(2')–Li(2)–N(4)  | 120.1(8)   |
| C(1)–Li(1)–Li(1)#1   | 76.38(14)  | O(2)–Li(2)–N(3)#2 | 113.8(5)   |

|                    |            |                      |            |
|--------------------|------------|----------------------|------------|
| C(1)–N(1)–C(10)    | 120.18(12) | O(2')–Li(2)–N(3)#2   | 113.7(7)   |
| C(1)–N(1)–Li(1)    | 91.30(13)  | N(4)–Li(2)–N(3)#2    | 123.00(15) |
| C(10)–N(1)–Li(1)   | 144.16(14) | O(2)–Li(2)–N(3)      | 116.2(4)   |
| C(1)–N(2)–C(13)    | 118.48(13) | O(2')–Li(2)–N(3)     | 113.5(7)   |
| C(1)–N(2)–Li(1)#1  | 125.81(14) | N(4)–Li(2)–N(3)      | 65.63(10)  |
| C(13)–N(2)–Li(1)#1 | 112.23(14) | N(3)#2–Li(2)–N(3)    | 108.89(13) |
| C(1)–N(2)–Li(1)    | 79.87(12)  | O(2)–Li(2)–C(21)     | 117.8(5)   |
| C(13)–N(2)–Li(1)   | 143.92(15) | O(2')–Li(2)–C(21)    | 116.8(7)   |
| Li(1)#1–N(2)–Li(1) | 69.85(15)  | N(4)–Li(2)–C(21)     | 33.27(7)   |
| N(1)–C(1)–N(2)     | 119.13(13) | N(3)#2–Li(2)–C(21)   | 126.48(14) |
| N(1)–C(1)–C(2)     | 120.72(14) | N(3)–Li(2)–C(21)     | 33.19(6)   |
| N(2)–C(1)–C(2)     | 120.15(14) | O(2)–Li(2)–Li(2)#2   | 136.6(6)   |
| N(1)–C(1)–Li(1)    | 55.52(10)  | O(2')–Li(2)–Li(2)#2  | 133.5(8)   |
| N(2)–C(1)–Li(1)    | 67.28(11)  | N(4)–Li(2)–Li(2)#2   | 94.66(16)  |
| C(2)–C(1)–Li(1)    | 159.71(14) | N(3)#2–Li(2)–Li(2)#2 | 57.58(11)  |
| C(3)–C(2)–C(1)     | 179.05(18) | N(3)–Li(2)–Li(2)#2   | 51.31(11)  |
| C(2)–C(3)–C(4)     | 178.56(17) | C(21)–Li(2)–Li(2)#2  | 75.16(13)  |
| C(9)–C(4)–C(5)     | 119.14(14) | C(21)–N(3)–C(30)     | 118.85(12) |
| C(9)–C(4)–C(3)     | 119.86(14) | C(21)–N(3)–Li(2)#2   | 122.45(13) |
| C(5)–C(4)–C(3)     | 121.00(15) | C(30)–N(3)–Li(2)#2   | 112.58(12) |
| C(6)–C(5)–C(4)     | 119.74(17) | C(21)–N(3)–Li(2)     | 81.43(11)  |
| C(7)–C(6)–C(5)     | 120.53(17) | C(30)–N(3)–Li(2)     | 144.14(13) |
| C(6)–C(7)–C(8)     | 120.34(16) | Li(2)#2–N(3)–Li(2)   | 71.11(13)  |
| C(7)–C(8)–C(9)     | 119.81(18) | C(21)–N(4)–C(33)     | 120.23(12) |
| C(8)–C(9)–C(4)     | 120.44(16) | C(21)–N(4)–Li(2)     | 90.81(12)  |
| N(1)–C(10)–C(11)   | 108.68(13) | C(33)–N(4)–Li(2)     | 146.92(13) |
| N(1)–C(10)–C(12)   | 110.93(14) | N(4)–C(21)–N(3)      | 119.09(13) |
| C(11)–C(10)–C(12)  | 110.71(15) | N(4)–C(21)–C(22)     | 120.44(13) |
| N(2)–C(13)–C(15)   | 110.12(17) | N(3)–C(21)–C(22)     | 120.45(14) |
| N(4)–C(21)–Li(2)   | 55.92(10)  | N(4)–C(33)–C(34)     | 108.73(14) |
| N(3)–C(21)–Li(2)   | 65.38(10)  | C(35)–C(33)–C(34)    | 110.27(16) |
| C(22)–C(21)–Li(2)  | 165.74(13) | C(39)–O(2)–C(36)     | 106.5(11)  |
| C(23)–C(22)–C(21)  | 176.32(17) | C(39)–O(2)–Li(2)     | 127.1(9)   |
| C(22)–C(23)–C(24)  | 177.84(18) | C(36)–O(2)–Li(2)     | 123.2(10)  |
| C(25)–C(24)–C(29)  | 119.23(14) | O(2)–C(36)–C(37)     | 99.0(9)    |
| C(25)–C(24)–C(23)  | 120.02(14) | C(38)–C(37)–C(36)    | 103.4(10)  |
| C(29)–C(24)–C(23)  | 120.75(15) | C(39)–C(38)–C(37)    | 106.7(11)  |
| C(26)–C(25)–C(24)  | 120.20(15) | C(38)–C(39)–O(2)     | 109.5(10)  |
| C(27)–C(26)–C(25)  | 120.13(17) | C(39')–O(2')–C(36')  | 113.1(19)  |
| C(28)–C(27)–C(26)  | 120.08(16) | C(39')–O(2')–Li(2)   | 123.1(18)  |
| C(27)–C(28)–C(29)  | 120.60(16) | C(36')–O(2')–Li(2)   | 119.8(15)  |
| C(28)–C(29)–C(24)  | 119.73(16) | C(37')–C(36')–O(2')  | 114.3(14)  |
| N(3)–C(30)–C(32)   | 109.01(15) | C(36')–C(37')–C(38') | 99.6(14)   |
| N(3)–C(30)–C(31)   | 110.91(16) | C(37')–C(38')–C(39') | 97.7(11)   |
| C(32)–C(30)–C(31)  | 110.84(17) | O(2')–C(39')–C(38')  | 97.0(18)   |
| N(4)–C(33)–C(35)   | 110.91(14) |                      |            |

Symmetry transformations used to generate equivalent atoms: # 1 – x – 1, –y – 1, –z + 1 # 2 – x + 1, –y, –z.

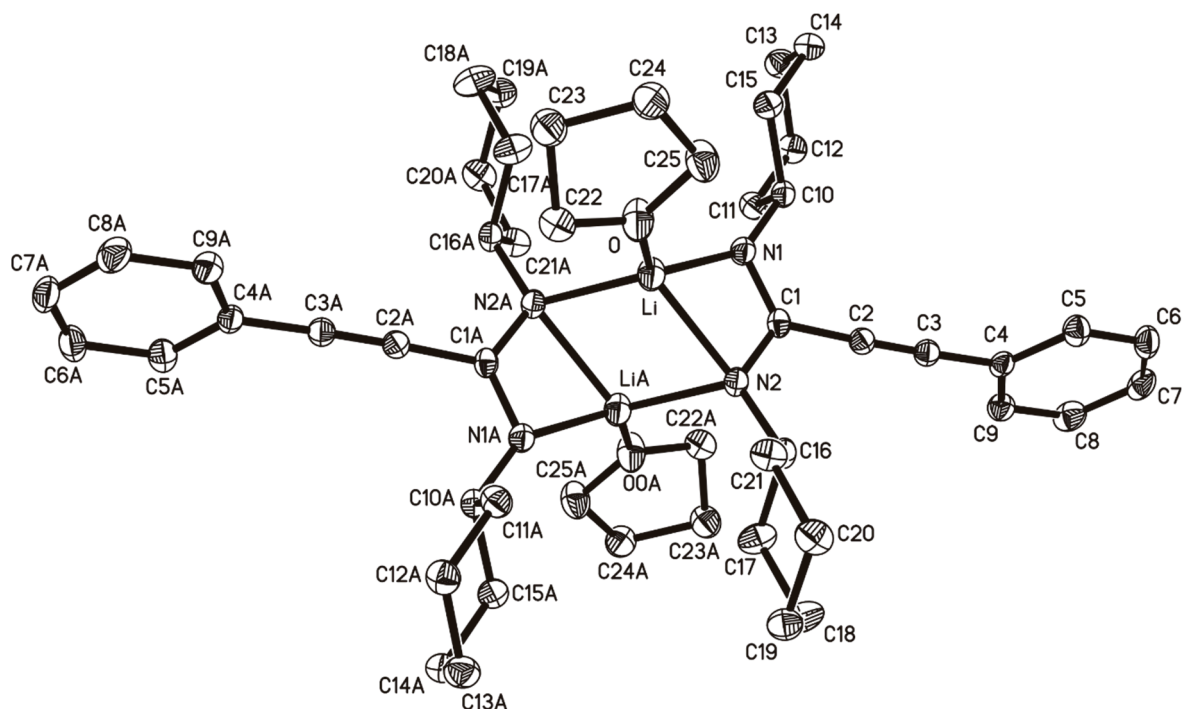

**Figure S4.** ORTEP representation of **2**. Displacement ellipsoids are drawn at the 50% probability level.

**Table S3.** Crystal data and structure refinement for **2**.

|                                        |                                                                                                                                                        |
|----------------------------------------|--------------------------------------------------------------------------------------------------------------------------------------------------------|
| Identification code                    | magd78                                                                                                                                                 |
| Empirical formula                      | $C_{50}H_{70}Li_2N_4O_2$                                                                                                                               |
| Formula weight                         | 772.98                                                                                                                                                 |
| Temperature                            | 100(2) K                                                                                                                                               |
| Wavelength                             | 1.54184 Å                                                                                                                                              |
| Crystal system                         | Triclinic                                                                                                                                              |
| Space group                            | P-1                                                                                                                                                    |
| Unit cell dimensions                   | $a = 9.8768(3)$ Å; $\alpha = 104.144(3)^\circ$ ;<br>$b = 10.2082(3)$ Å; $\beta = 90.248(3)^\circ$ ;<br>$c = 11.6883(4)$ Å; $\gamma = 104.209(2)^\circ$ |
| Volume                                 | $1105.18(6)$ Å <sup>3</sup>                                                                                                                            |
| <i>Z</i>                               | 1                                                                                                                                                      |
| Density (calculated)                   | 1.161 Mg/m <sup>3</sup>                                                                                                                                |
| Absorption coefficient                 | 0.530 mm <sup>-1</sup>                                                                                                                                 |
| <i>F</i> (000)                         | 420                                                                                                                                                    |
| Crystal size                           | $0.12 \times 0.10 \times 0.10$ mm <sup>3</sup>                                                                                                         |
| $\theta$ range for data collection     | $3.91^\circ$ to $76.97^\circ$                                                                                                                          |
| Index ranges                           | $-12 \leq h \leq 12$ , $-12 \leq k \leq 12$ , $-14 \leq l \leq 12$                                                                                     |
| Reflections collected                  | 40,575                                                                                                                                                 |
| Independent reflections                | 4628 [ $R(\text{int}) = 0.0274$ ]                                                                                                                      |
| Completeness to $\theta = 76.97^\circ$ | 99.20%                                                                                                                                                 |
| Absorption correction                  | Semi-empirical from equivalents                                                                                                                        |
| Max. and min. transmission             | 0.9490 and 0.9392                                                                                                                                      |
| Refinement method                      | Full-matrix least-squares on $F^2$                                                                                                                     |
| Data/restraints/parameters             | 4628/0/262                                                                                                                                             |

|                                      |                                              |
|--------------------------------------|----------------------------------------------|
| Goodness-of-fit on $F^2$             | 1.027                                        |
| Final R indices [ $I > 2\sigma(I)$ ] | $R1 = 0.0392$ , $wR2 = 0.0964$               |
| R indices (all data)                 | $R1 = 0.0403$ , $wR2 = 0.0974$               |
| Largest difference peak and hole     | 0.199 and $-0.243 \text{ e.}\text{\AA}^{-3}$ |

**Table S4.** Bond lengths [ $\text{\AA}$ ] and angles [ $^\circ$ ] for **2**.

|                   |            |                   |            |
|-------------------|------------|-------------------|------------|
| O–C(25)           | 1.4294(13) | C(8)–C(9)         | 1.3879(14) |
| O–C(22)           | 1.4341(13) | C(10)–C(15)       | 1.5267(14) |
| O–Li              | 1.9518(19) | C(10)–C(11)       | 1.5305(14) |
| N(1)–C(1)         | 1.3201(13) | C(11)–C(12)       | 1.5294(14) |
| N(1)–C(10)        | 1.4560(12) | C(12)–C(13)       | 1.5307(15) |
| N(1)–Li           | 2.031(2)   | C(13)–C(14)       | 1.5276(15) |
| N(2)–C(1)         | 1.3407(12) | C(14)–C(15)       | 1.5262(14) |
| N(2)–C(16)        | 1.4646(12) | C(16)–C(17)       | 1.5289(14) |
| N(2)–Li#1         | 2.0580(19) | C(16)–C(21)       | 1.5294(13) |
| N(2)–Li           | 2.188(2)   | C(17)–C(18)       | 1.5337(15) |
| C(1)–C(2)         | 1.4681(13) | C(18)–C(19)       | 1.5232(15) |
| C(1)–Li           | 2.425(2)   | C(19)–C(20)       | 1.5219(15) |
| C(2)–C(3)         | 1.2018(14) | C(20)–C(21)       | 1.5310(15) |
| C(3)–C(4)         | 1.4366(13) | C(22)–C(23)       | 1.5132(15) |
| C(4)–C(9)         | 1.3979(14) | C(23)–C(24)       | 1.5317(16) |
| C(4)–C(5)         | 1.3989(14) | C(24)–C(25)       | 1.5269(16) |
| C(5)–C(6)         | 1.3903(15) | Li–N(2)#1         | 2.0580(19) |
| C(6)–C(7)         | 1.3833(17) | Li–Li#1           | 2.476(4)   |
| C(7)–C(8)         | 1.3869(17) |                   |            |
| C(25)–O–C(22)     | 108.48(8)  | C(2)–C(1)–Li      | 168.85(8)  |
| C(25)–O–Li        | 125.85(9)  | C(3)–C(2)–C(1)    | 175.39(10) |
| C(22)–O–Li        | 125.50(8)  | C(2)–C(3)–C(4)    | 178.27(11) |
| C(1)–N(1)–C(10)   | 119.80(8)  | C(9)–C(4)–C(5)    | 119.23(9)  |
| C(1)–N(1)–Li      | 90.13(8)   | C(9)–C(4)–C(3)    | 119.93(9)  |
| C(10)–N(1)–Li     | 149.12(8)  | C(5)–C(4)–C(3)    | 120.84(9)  |
| C(1)–N(2)–C(16)   | 118.73(8)  | C(6)–C(5)–C(4)    | 119.97(10) |
| C(1)–N(2)–Li#1    | 117.48(8)  | C(7)–C(6)–C(5)    | 120.38(10) |
| C(16)–N(2)–Li#1   | 115.92(8)  | C(6)–C(7)–C(8)    | 120.02(10) |
| C(1)–N(2)–Li      | 83.13(7)   | C(7)–C(8)–C(9)    | 120.15(10) |
| C(16)–N(2)–Li     | 142.29(8)  | C(8)–C(9)–C(4)    | 120.25(10) |
| Li#1–N(2)–Li      | 71.27(8)   | N(1)–C(10)–C(15)  | 109.76(8)  |
| N(1)–C(1)–N(2)    | 118.89(8)  | N(1)–C(10)–C(11)  | 111.76(8)  |
| N(1)–C(1)–C(2)    | 120.49(9)  | C(15)–C(10)–C(11) | 109.74(8)  |
| N(2)–C(1)–C(2)    | 120.58(9)  | C(12)–C(11)–C(10) | 111.56(8)  |
| N(1)–C(1)–Li      | 56.89(7)   | C(11)–C(12)–C(13) | 110.87(9)  |
| N(2)–C(1)–Li      | 63.58(7)   | C(14)–C(13)–C(12) | 111.43(9)  |
| C(15)–C(14)–C(13) | 111.06(9)  | O–Li–N(2)#1       | 108.03(9)  |
| C(14)–C(15)–C(10) | 111.38(8)  | N(1)–Li–N(2)#1    | 118.44(9)  |
| N(2)–C(16)–C(17)  | 111.89(8)  | O–Li–N(2)         | 122.23(9)  |
| N(2)–C(16)–C(21)  | 108.99(8)  | N(1)–Li–N(2)      | 65.67(6)   |
| C(17)–C(16)–C(21) | 109.82(8)  | N(2)#1–Li–N(2)    | 108.73(8)  |

|                   |            |                |            |
|-------------------|------------|----------------|------------|
| C(16)–C(17)–C(18) | 112.20(9)  | O–Li–C(1)      | 127.75(9)  |
| C(19)–C(18)–C(17) | 111.06(9)  | N(1)–Li–C(1)   | 32.98(4)   |
| C(20)–C(19)–C(18) | 110.73(9)  | N(2)#1–Li–C(1) | 123.01(9)  |
| C(19)–C(20)–C(21) | 111.50(9)  | N(2)–Li–C(1)   | 33.29(4)   |
| C(16)–C(21)–C(20) | 113.11(9)  | O–Li–Li#1      | 136.76(13) |
| O–C(22)–C(23)     | 104.21(9)  | N(1)–Li–Li#1   | 91.83(10)  |
| C(22)–C(23)–C(24) | 102.73(9)  | N(2)#1–Li–Li#1 | 56.80(7)   |
| C(25)–C(24)–C(23) | 103.79(9)  | N(2)–Li–Li#1   | 51.93(7)   |
| O–C(25)–C(24)     | 107.33(9)  | C(1)–Li–Li#1   | 73.40(8)   |
| O–Li–N(1)         | 126.92(10) |                |            |

Symmetry transformations used to generate equivalent atoms: # 1  $-x, -y + 1, -z + 2$ .

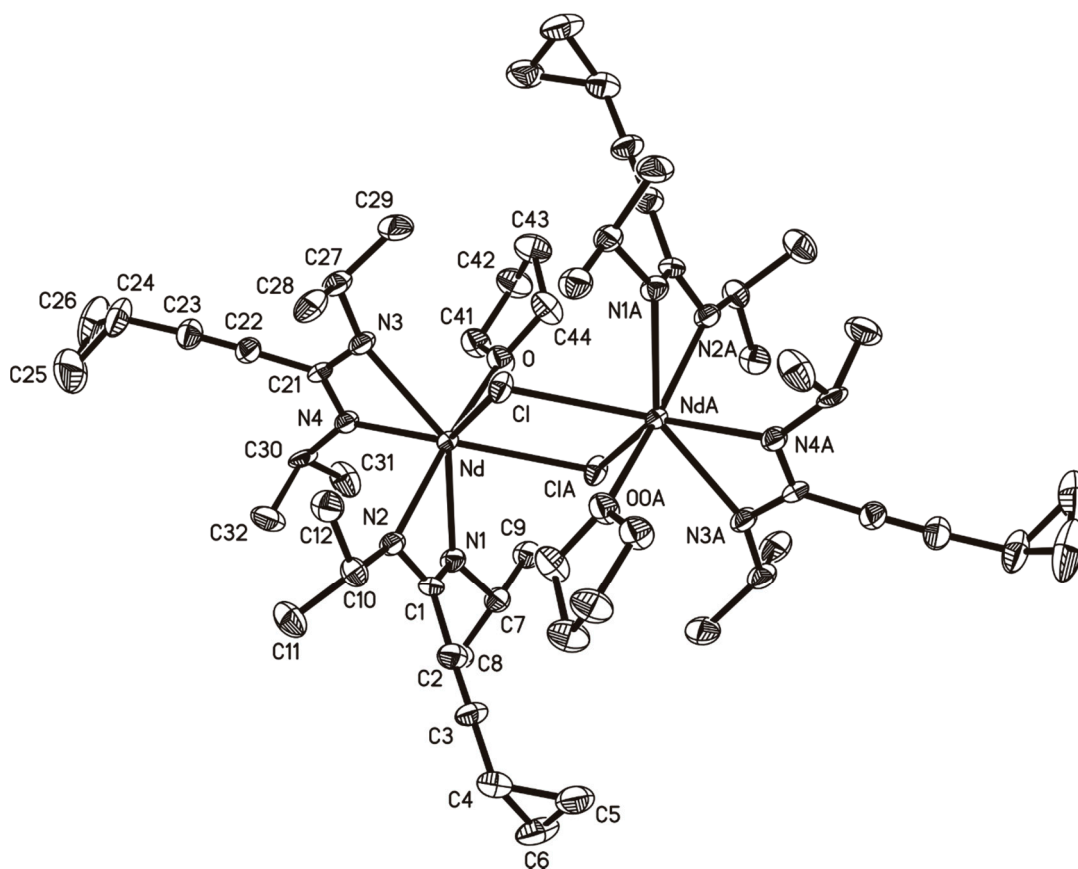

**Figure S5.** ORTEP representation of **8**. Displacement ellipsoids are drawn at the 50% probability level.

**Table S5.** Crystal data and structure refinement for **8**.

|                     |                                                                                               |
|---------------------|-----------------------------------------------------------------------------------------------|
| Identification code | ip407                                                                                         |
| Empirical formula   | C <sub>56</sub> H <sub>92</sub> Cl <sub>2</sub> N <sub>8</sub> Nd <sub>2</sub> O <sub>2</sub> |
| Formula weight      | 1268.76                                                                                       |
| Temperature         | 153(2) K                                                                                      |
| Wavelength          | 0.71073 Å                                                                                     |
| Crystal system      | Triclinic                                                                                     |
| Space group         | P-1                                                                                           |



|                                        |                                                                                                                                                                                  |
|----------------------------------------|----------------------------------------------------------------------------------------------------------------------------------------------------------------------------------|
| Unit cell dimensions                   | $a = 10.049(2) \text{ \AA}$ ; $\alpha = 82.53(3)^\circ$ ;<br>$b = 11.337(2) \text{ \AA}$ ; $\beta = 83.02(3)^\circ$ ;<br>$c = 14.471(3) \text{ \AA}$ ; $\gamma = 73.74(3)^\circ$ |
| Volume                                 | $1562.9(5) \text{ \AA}^3$                                                                                                                                                        |
| $Z$                                    | 1                                                                                                                                                                                |
| Density (calculated)                   | $1.348 \text{ Mg/m}^3$                                                                                                                                                           |
| Absorption coefficient                 | $1.771 \text{ mm}^{-1}$                                                                                                                                                          |
| $F(000)$                               | 654                                                                                                                                                                              |
| Crystal size                           | $0.46 \times 0.34 \times 0.22 \text{ mm}^3$                                                                                                                                      |
| $\theta$ range for data collection     | $2.45^\circ$ to $29.17^\circ$                                                                                                                                                    |
| Index ranges                           | $-13 \leq h \leq 13$ , $-15 \leq k \leq 13$ , $-19 \leq l \leq 18$                                                                                                               |
| Reflections collected                  | 17,971                                                                                                                                                                           |
| Independent reflections                | 8340 [ $R(\text{int}) = 0.0916$ ]                                                                                                                                                |
| Completeness to $\theta = 29.17^\circ$ | 98.80%                                                                                                                                                                           |
| Absorption correction                  | Sphere                                                                                                                                                                           |
| Max. and min. transmission             | 0.3338 and 0.3176                                                                                                                                                                |
| Refinement method                      | Full-matrix least-squares on $F^2$                                                                                                                                               |
| Data/restraints/parameters             | 8340/0/324                                                                                                                                                                       |
| Goodness-of-fit on $F^2$               | 1.219                                                                                                                                                                            |
| Final R indices [ $I > 2\sigma(I)$ ]   | $R1 = 0.0547$ , $wR2 = 0.1647$                                                                                                                                                   |
| R indices (all data)                   | $R1 = 0.0589$ , $wR2 = 0.1663$                                                                                                                                                   |
| Largest diff. peak and hole            | $3.507$ and $-2.740 \text{ e.\AA}^{-3}$                                                                                                                                          |

**Table S6.** Bond lengths [ $\text{\AA}$ ] and angles [ $^\circ$ ] for **8**.

|            |            |             |           |
|------------|------------|-------------|-----------|
| Cl–Nd      | 2.7961(16) | C(3)–C(4)   | 1.425(10) |
| Cl–Nd#1    | 2.8908(17) | C(4)–C(6)   | 1.510(12) |
| Nd–N(2)    | 2.423(5)   | C(4)–C(5)   | 1.511(12) |
| Nd–N(4)    | 2.464(5)   | C(5)–C(6)   | 1.469(12) |
| Nd–N(1)    | 2.478(5)   | C(7)–C(9)   | 1.520(9)  |
| Nd–N(3)    | 2.484(5)   | C(7)–C(8)   | 1.534(9)  |
| Nd–O       | 2.504(5)   | C(10)–C(12) | 1.521(9)  |
| Nd–C(1)    | 2.810(5)   | C(10)–C(11) | 1.526(10) |
| Nd–C(21)   | 2.865(5)   | C(21)–C(22) | 1.458(8)  |
| Nd–Cl#1    | 2.8908(17) | C(22)–C(23) | 1.188(9)  |
| O–C(44)    | 1.443(9)   | C(23)–C(24) | 1.439(9)  |
| O–C(41)    | 1.449(8)   | C(24)–C(25) | 1.450(15) |
| N(1)–C(1)  | 1.338(8)   | C(24)–C(26) | 1.470(12) |
| N(1)–C(7)  | 1.463(7)   | C(25)–C(26) | 1.425(19) |
| N(2)–C(1)  | 1.332(7)   | C(27)–C(29) | 1.513(10) |
| N(2)–C(10) | 1.470(8)   | C(27)–C(28) | 1.519(11) |
| N(3)–C(21) | 1.321(8)   | C(30)–C(32) | 1.503(10) |
| N(3)–C(27) | 1.456(7)   | C(30)–C(31) | 1.519(10) |
| N(4)–C(21) | 1.345(7)   | C(41)–C(42) | 1.516(10) |
| N(4)–C(30) | 1.456(8)   | C(42)–C(43) | 1.524(11) |
| C(1)–C(2)  | 1.444(8)   | C(43)–C(44) | 1.513(10) |
| C(2)–C(3)  | 1.186(9)   |             |           |
| Nd–Cl–Nd#1 | 106.85(5)  | N(3)–Nd–Cl  | 82.57(13) |

|                  |            |                   |            |
|------------------|------------|-------------------|------------|
| N(2)–Nd–N(4)     | 91.56(17)  | O–Nd–Cl           | 101.13(12) |
| N(2)–Nd–N(1)     | 54.95(17)  | N(2)–Nd–C(1)      | 28.26(17)  |
| N(4)–Nd–N(1)     | 88.55(16)  | N(4)–Nd–C(1)      | 97.32(17)  |
| N(2)–Nd–N(3)     | 105.47(19) | N(1)–Nd–C(1)      | 28.43(17)  |
| N(4)–Nd–N(3)     | 54.74(16)  | N(3)–Nd–C(1)      | 130.77(19) |
| N(1)–Nd–N(3)     | 139.93(17) | O–Nd–C(1)         | 138.76(18) |
| N(2)–Nd–O        | 164.94(17) | Cl–Nd–C(1)        | 106.44(13) |
| N(4)–Nd–O        | 82.40(17)  | N(2)–Nd–C(21)     | 95.32(17)  |
| N(1)–Nd–O        | 110.87(17) | N(4)–Nd–C(21)     | 27.97(15)  |
| N(3)–Nd–O        | 82.31(19)  | N(1)–Nd–C(21)     | 113.37(17) |
| N(2)–Nd–Cl       | 92.75(13)  | N(3)–Nd–C(21)     | 27.43(16)  |
| N(4)–Nd–Cl       | 136.57(11) | O–Nd–C(21)        | 85.82(16)  |
| N(1)–Nd–Cl       | 128.07(13) | Cl–Nd–C(21)       | 108.62(12) |
| C(1)–Nd–C(21)    | 112.79(17) | C(3)–C(4)–C(5)    | 120.5(7)   |
| N(2)–Nd–Cl#1     | 104.70(12) | C(6)–C(4)–C(5)    | 58.2(6)    |
| N(4)–Nd–Cl#1     | 146.09(12) | C(6)–C(5)–C(4)    | 60.8(6)    |
| N(1)–Nd–Cl#1     | 77.50(13)  | C(5)–C(6)–C(4)    | 61.0(6)    |
| N(3)–Nd–Cl#1     | 141.83(13) | N(1)–C(7)–C(9)    | 108.8(5)   |
| O–Nd–Cl#1        | 74.27(12)  | N(1)–C(7)–C(8)    | 111.1(5)   |
| Cl–Nd–Cl#1       | 73.15(5)   | C(9)–C(7)–C(8)    | 109.8(6)   |
| C(1)–Nd–Cl#1     | 85.00(13)  | N(2)–C(10)–C(12)  | 107.5(5)   |
| C(21)–Nd–Cl#1    | 159.85(12) | N(2)–C(10)–C(11)  | 110.8(5)   |
| C(44)–O–C(41)    | 110.0(5)   | C(12)–C(10)–C(11) | 110.8(6)   |
| C(44)–O–Nd       | 118.3(4)   | N(3)–C(21)–N(4)   | 117.1(5)   |
| C(41)–O–Nd       | 128.2(4)   | N(3)–C(21)–C(22)  | 122.3(5)   |
| C(1)–N(1)–C(7)   | 119.3(5)   | N(4)–C(21)–C(22)  | 120.6(5)   |
| C(1)–N(1)–Nd     | 89.7(3)    | N(3)–C(21)–Nd     | 60.0(3)    |
| C(7)–N(1)–Nd     | 139.0(4)   | N(4)–C(21)–Nd     | 59.2(3)    |
| C(1)–N(2)–C(10)  | 119.6(5)   | C(22)–C(21)–Nd    | 166.1(4)   |
| C(1)–N(2)–Nd     | 92.2(4)    | C(23)–C(22)–C(21) | 177.8(7)   |
| C(10)–N(2)–Nd    | 144.1(4)   | C(22)–C(23)–C(24) | 177.6(8)   |
| C(21)–N(3)–C(27) | 120.1(5)   | C(23)–C(24)–C(25) | 120.4(8)   |
| C(21)–N(3)–Nd    | 92.5(3)    | C(23)–C(24)–C(26) | 120.3(8)   |
| C(27)–N(3)–Nd    | 145.0(4)   | C(25)–C(24)–C(26) | 58.4(9)    |
| C(21)–N(4)–C(30) | 119.7(5)   | C(26)–C(25)–C(24) | 61.5(8)    |
| C(21)–N(4)–Nd    | 92.8(3)    | C(25)–C(26)–C(24) | 60.1(8)    |
| C(30)–N(4)–Nd    | 140.6(3)   | N(3)–C(27)–C(29)  | 110.1(6)   |
| N(2)–C(1)–N(1)   | 115.9(5)   | N(3)–C(27)–C(28)  | 112.2(6)   |
| N(2)–C(1)–C(2)   | 121.5(6)   | C(29)–C(27)–C(28) | 110.3(6)   |
| N(1)–C(1)–C(2)   | 122.4(6)   | N(4)–C(30)–C(32)  | 113.1(6)   |
| N(2)–C(1)–Nd     | 59.5(3)    | N(4)–C(30)–C(31)  | 107.9(6)   |
| N(1)–C(1)–Nd     | 61.9(3)    | C(32)–C(30)–C(31) | 110.7(6)   |
| C(2)–C(1)–Nd     | 153.0(4)   | O–C(41)–C(42)     | 106.0(6)   |
| C(3)–C(2)–C(1)   | 177.5(8)   | C(41)–C(42)–C(43) | 102.3(6)   |
| C(2)–C(3)–C(4)   | 179.2(9)   | C(44)–C(43)–C(42) | 102.5(6)   |
| C(3)–C(4)–C(6)   | 120.2(8)   | O–C(44)–C(43)     | 105.1(6)   |

Symmetry transformations used to generate equivalent atoms: #1  $-x + 1, -y + 2, -z + 1$ .

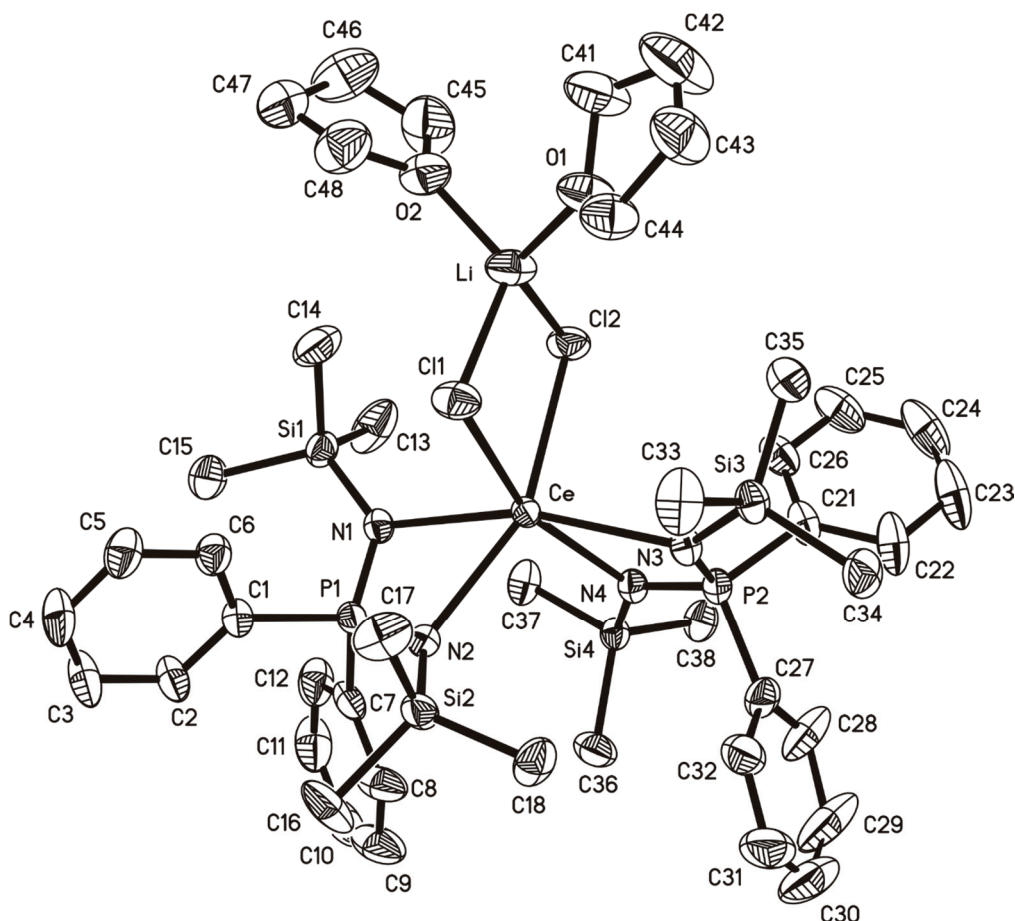

**Figure S6.** ORTEP representation of **9**. Displacement ellipsoids are drawn at the 50% probability level.

**Table S7.** Crystal data and structure refinement for **9**.

|                             |                                                                                                                  |
|-----------------------------|------------------------------------------------------------------------------------------------------------------|
| Identification code         | ip223                                                                                                            |
| Empirical formula           | C <sub>44</sub> H <sub>72</sub> CeCl <sub>2</sub> LiN <sub>4</sub> O <sub>2</sub> P <sub>2</sub> Si <sub>4</sub> |
| Formula weight              | 1081.32                                                                                                          |
| Temperature                 | 153(2) K                                                                                                         |
| Wavelength                  | 0.71073 Å                                                                                                        |
| Crystal system              | Monoclinic                                                                                                       |
| Space group                 | P2 <sub>1</sub> /n                                                                                               |
| Unit cell dimensions        | a = 11.117(2) Å; α = 90°;<br>b = 36.425(7) Å; β = 96.70(3)°;<br>c = 13.538(3) Å; γ = 90°                         |
| Volume                      | 5444.3(19) Å <sup>3</sup>                                                                                        |
| Z                           | 4                                                                                                                |
| Density (calculated)        | 1.319 Mg/m <sup>3</sup>                                                                                          |
| Absorption coefficient      | 1.118 mm <sup>-1</sup>                                                                                           |
| F(000)                      | 2244                                                                                                             |
| Crystal size                | 0.40 × 0.40 × 0.30 mm <sup>3</sup>                                                                               |
| θ range for data collection | 1.88° to 28.28°                                                                                                  |
| Index ranges                | -14 ≤ h ≤ 14, -45 ≤ k ≤ 48, -18 ≤ l ≤ 18                                                                         |
| Reflections collected       | 43,147                                                                                                           |

|                                        |                                              |
|----------------------------------------|----------------------------------------------|
| Independent reflections                | 12841 [R(int) = 0.0721]                      |
| Completeness to $\theta = 28.28^\circ$ | 95.10%                                       |
| Absorption correction                  | Sphere                                       |
| Max. and min. transmission             | 0.5625 and 0.5558                            |
| Refinement method                      | Full-matrix least-squares on $F^2$           |
| Data/restraints/parameters             | 12841/0/569                                  |
| Goodness-of-fit on $F^2$               | 0.977                                        |
| Final $R$ indices [ $I > 2\sigma(I)$ ] | $R1 = 0.0363$ , $wR2 = 0.0806$               |
| $R$ indices (all data)                 | $R1 = 0.0531$ , $wR2 = 0.0859$               |
| Largest difference peak and hole       | 0.614 and $-0.950 \text{ e.}\text{\AA}^{-3}$ |

**Table S8.** Bond lengths [ $\text{\AA}$ ] and angles [ $^\circ$ ] for **9**.

|              |           |             |          |
|--------------|-----------|-------------|----------|
| Li–O(1)      | 1.938(6)  | Si(4)–C(37) | 1.850(3) |
| Li–O(2)      | 1.948(6)  | Si(4)–C(36) | 1.869(3) |
| Li–Cl(1)     | 2.359(6)  | Si(4)–C(38) | 1.875(3) |
| Li–Cl(2)     | 2.385(6)  | C(1)–C(6)   | 1.384(4) |
| Li–Ce        | 3.726(5)  | C(1)–C(2)   | 1.396(4) |
| Ce–N(4)      | 2.483(2)  | C(2)–C(3)   | 1.382(4) |
| Ce–N(2)      | 2.499(2)  | C(3)–C(4)   | 1.371(5) |
| Ce–N(1)      | 2.555(2)  | C(4)–C(5)   | 1.379(5) |
| Ce–N(3)      | 2.557(2)  | C(5)–C(6)   | 1.383(4) |
| Ce–Cl(2)     | 2.8069(8) | C(7)–C(12)  | 1.387(5) |
| Ce–Cl(1)     | 2.8095(8) | C(7)–C(8)   | 1.390(5) |
| Ce–P(1)      | 3.1189(9) | C(8)–C(9)   | 1.391(5) |
| Ce–P(2)      | 3.1290(8) | C(9)–C(10)  | 1.378(6) |
| P(1)–N(1)    | 1.593(2)  | C(10)–C(11) | 1.360(7) |
| P(1)–N(2)    | 1.594(2)  | C(11)–C(12) | 1.390(5) |
| P(1)–C(1)    | 1.815(3)  | C(21)–C(26) | 1.384(5) |
| P(1)–C(7)    | 1.819(3)  | C(21)–C(22) | 1.388(4) |
| P(2)–N(4)    | 1.593(2)  | C(22)–C(23) | 1.394(5) |
| P(2)–N(3)    | 1.598(2)  | C(23)–C(24) | 1.366(7) |
| P(2)–C(27)   | 1.815(3)  | C(24)–C(25) | 1.382(6) |
| P(2)–C(21)   | 1.830(3)  | C(25)–C(26) | 1.391(4) |
| Si(1)–N(1)   | 1.720(2)  | C(27)–C(28) | 1.390(5) |
| Si(1)–C(14)  | 1.856(4)  | C(27)–C(32) | 1.391(4) |
| Si(1)–C(13)  | 1.857(4)  | C(28)–C(29) | 1.391(6) |
| Si(1)–C(15)  | 1.874(3)  | C(29)–C(30) | 1.360(8) |
| Si(2)–N(2)   | 1.721(2)  | C(30)–C(31) | 1.363(8) |
| Si(2)–C(16') | 1.751(8)  | C(31)–C(32) | 1.395(5) |
| Si(2)–C(17') | 1.772(8)  | C(41)–O(1)  | 1.417(4) |
| Si(2)–C(18)  | 1.816(5)  | C(41)–C(42) | 1.467(6) |
| Si(2)–C(16)  | 1.868(6)  | C(42)–C(43) | 1.468(6) |
| Si(2)–C(17)  | 1.984(6)  | C(43)–C(44) | 1.515(5) |
| Si(2)–C(18') | 1.987(7)  | C(44)–O(1)  | 1.436(4) |
| Si(3)–N(3)   | 1.721(2)  | C(45)–O(2)  | 1.435(4) |
| Si(3)–C(34)  | 1.862(3)  | C(45)–C(46) | 1.469(7) |

|                    |           |                     |            |
|--------------------|-----------|---------------------|------------|
| Si(3)–C(35)        | 1.865(3)  | C(46)–C(47)         | 1.484(7)   |
| Si(3)–C(33)        | 1.869(3)  | C(47)–C(48)         | 1.477(6)   |
| Si(4)–N(4)         | 1.724(2)  | C(48)–O(2)          | 1.443(5)   |
| O(1)–Li–O(2)       | 99.1(3)   | N(4)–Ce–Li          | 130.39(11) |
| O(1)–Li–Cl(1)      | 106.6(3)  | N(2)–Ce–Li          | 128.90(11) |
| O(2)–Li–Cl(1)      | 119.4(3)  | N(1)–Ce–Li          | 99.31(11)  |
| O(1)–Li–Cl(2)      | 124.6(3)  | N(3)–Ce–Li          | 97.89(11)  |
| O(2)–Li–Cl(2)      | 111.0(3)  | Cl(2)–Ce–Li         | 39.78(9)   |
| Cl(1)–Li–Cl(2)     | 97.7(2)   | Cl(1)–Ce–Li         | 39.26(10)  |
| O(1)–Li–Ce         | 128.6(3)  | P(1)–Ce–Li          | 119.20(10) |
| O(2)–Li–Ce         | 132.0(2)  | P(2)–Ce–Li          | 115.94(10) |
| Cl(1)–Li–Ce        | 48.91(10) | N(1)–P(1)–N(2)      | 107.10(11) |
| Cl(2)–Li–Ce        | 48.87(10) | N(1)–P(1)–C(1)      | 112.42(13) |
| N(4)–Ce–N(2)       | 100.71(7) | N(2)–P(1)–C(1)      | 111.12(12) |
| N(4)–Ce–N(1)       | 106.18(7) | N(1)–P(1)–C(7)      | 111.59(13) |
| N(2)–Ce–N(1)       | 60.96(7)  | N(2)–P(1)–C(7)      | 110.89(14) |
| N(4)–Ce–N(3)       | 60.80(7)  | C(1)–P(1)–C(7)      | 103.79(12) |
| N(2)–Ce–N(3)       | 108.26(7) | N(1)–P(1)–Ce        | 54.74(8)   |
| N(1)–Ce–N(3)       | 162.75(7) | N(2)–P(1)–Ce        | 52.70(8)   |
| N(4)–Ce–Cl(2)      | 94.34(5)  | C(1)–P(1)–Ce        | 133.71(9)  |
| N(2)–Ce–Cl(2)      | 156.49(5) | C(7)–P(1)–Ce        | 122.44(9)  |
| N(1)–Ce–Cl(2)      | 97.61(6)  | N(4)–P(2)–N(3)      | 106.18(12) |
| N(3)–Ce–Cl(2)      | 94.81(6)  | N(4)–P(2)–C(27)     | 109.90(13) |
| N(4)–Ce–Cl(1)      | 158.85(5) | N(3)–P(2)–C(27)     | 113.00(13) |
| N(2)–Ce–Cl(1)      | 92.48(6)  | N(4)–P(2)–C(21)     | 109.97(12) |
| N(1)–Ce–Cl(1)      | 94.65(5)  | N(3)–P(2)–C(21)     | 113.65(13) |
| N(3)–Ce–Cl(1)      | 99.45(6)  | C(27)–P(2)–C(21)    | 104.17(15) |
| Cl(2)–Ce–Cl(1)     | 79.00(3)  | N(4)–P(2)–Ce        | 51.81(8)   |
| N(4)–Ce–P(1)       | 103.41(5) | N(3)–P(2)–Ce        | 54.52(8)   |
| N(2)–Ce–P(1)       | 30.50(5)  | C(27)–P(2)–Ce       | 130.79(10) |
| N(1)–Ce–P(1)       | 30.60(5)  | C(21)–P(2)–Ce       | 124.75(11) |
| N(3)–Ce–P(1)       | 136.50(5) | N(1)–Si(1)–C(14)    | 108.97(14) |
| Cl(2)–Ce–P(1)      | 128.02(3) | N(1)–Si(1)–C(13)    | 111.24(14) |
| Cl(1)–Ce–P(1)      | 96.36(3)  | C(14)–Si(1)–C(13)   | 107.6(2)   |
| N(4)–Ce–P(2)       | 30.29(5)  | N(1)–Si(1)–C(15)    | 114.77(14) |
| N(2)–Ce–P(2)       | 108.28(5) | C(14)–Si(1)–C(15)   | 105.12(18) |
| N(1)–Ce–P(2)       | 135.93(5) | C(13)–Si(1)–C(15)   | 108.71(19) |
| N(3)–Ce–P(2)       | 30.58(5)  | N(2)–Si(2)–C(16')   | 116.2(3)   |
| Cl(2)–Ce–P(2)      | 93.82(3)  | N(2)–Si(2)–C(17')   | 104.3(3)   |
| Cl(1)–Ce–P(2)      | 129.34(3) | C(16')–Si(2)–C(17') | 119.3(5)   |
| P(1)–Ce–P(2)       | 124.82(2) | N(2)–Si(2)–C(18)    | 113.16(19) |
| C(16')–Si(2)–C(18) | 129.1(3)  | Si(3)–N(3)–Ce       | 131.61(12) |
| C(17')–Si(2)–C(18) | 56.6(4)   | P(2)–N(4)–Si(4)     | 131.34(14) |
| N(2)–Si(2)–C(16)   | 116.3(2)  | P(2)–N(4)–Ce        | 97.90(10)  |
| C(16')–Si(2)–C(16) | 34.2(4)   | Si(4)–N(4)–Ce       | 129.88(11) |
| C(17')–Si(2)–C(16) | 138.6(3)  | C(6)–C(1)–C(2)      | 118.8(3)   |
| C(18)–Si(2)–C(16)  | 110.1(3)  | C(6)–C(1)–P(1)      | 118.0(2)   |

|                     |            |                   |          |
|---------------------|------------|-------------------|----------|
| N(2)–Si(2)–C(17)    | 110.78(19) | C(2)–C(1)–P(1)    | 123.2(2) |
| C(16')–Si(2)–C(17)  | 70.0(4)    | C(3)–C(2)–C(1)    | 119.9(3) |
| C(17')–Si(2)–C(17)  | 53.8(4)    | C(4)–C(3)–C(2)    | 120.6(3) |
| C(18)–Si(2)–C(17)   | 103.4(3)   | C(3)–C(4)–C(5)    | 120.1(3) |
| C(16)–Si(2)–C(17)   | 101.7(3)   | C(4)–C(5)–C(6)    | 119.6(3) |
| N(2)–Si(2)–C(18')   | 104.8(2)   | C(5)–C(6)–C(1)    | 120.9(3) |
| C(16')–Si(2)–C(18') | 106.6(4)   | C(12)–C(7)–C(8)   | 118.8(3) |
| C(17')–Si(2)–C(18') | 104.2(4)   | C(12)–C(7)–P(1)   | 120.5(3) |
| C(18)–Si(2)–C(18')  | 47.6(3)    | C(8)–C(7)–P(1)    | 120.7(3) |
| C(16)–Si(2)–C(18')  | 73.9(4)    | C(7)–C(8)–C(9)    | 120.9(4) |
| C(17)–Si(2)–C(18')  | 141.6(3)   | C(10)–C(9)–C(8)   | 119.4(4) |
| N(3)–Si(3)–C(34)    | 113.48(14) | C(11)–C(10)–C(9)  | 119.9(3) |
| N(3)–Si(3)–C(35)    | 110.09(13) | C(10)–C(11)–C(12) | 121.4(4) |
| C(34)–Si(3)–C(35)   | 108.34(16) | C(7)–C(12)–C(11)  | 119.5(4) |
| N(3)–Si(3)–C(33)    | 109.43(14) | C(26)–C(21)–C(22) | 119.2(3) |
| C(34)–Si(3)–C(33)   | 105.82(16) | C(26)–C(21)–P(2)  | 118.3(2) |
| C(35)–Si(3)–C(33)   | 109.55(19) | C(22)–C(21)–P(2)  | 122.6(3) |
| N(4)–Si(4)–C(37)    | 106.28(13) | C(21)–C(22)–C(23) | 119.9(4) |
| N(4)–Si(4)–C(36)    | 111.03(13) | C(24)–C(23)–C(22) | 120.5(4) |
| C(37)–Si(4)–C(36)   | 110.77(16) | C(23)–C(24)–C(25) | 120.1(3) |
| N(4)–Si(4)–C(38)    | 113.99(12) | C(24)–C(25)–C(26) | 119.8(4) |
| C(37)–Si(4)–C(38)   | 106.78(13) | C(21)–C(26)–C(25) | 120.5(3) |
| C(36)–Si(4)–C(38)   | 107.93(15) | C(28)–C(27)–C(32) | 117.8(4) |
| Li–Cl(1)–Ce         | 91.83(15)  | C(28)–C(27)–P(2)  | 122.1(3) |
| Li–Cl(2)–Ce         | 91.35(14)  | C(32)–C(27)–P(2)  | 119.6(3) |
| P(1)–N(1)–Si(1)     | 132.97(14) | C(27)–C(28)–C(29) | 121.0(5) |
| P(1)–N(1)–Ce        | 94.66(10)  | C(30)–C(29)–C(28) | 120.5(5) |
| Si(1)–N(1)–Ce       | 129.68(11) | C(29)–C(30)–C(31) | 119.6(4) |
| P(1)–N(2)–Si(2)     | 132.10(14) | C(30)–C(31)–C(32) | 121.1(5) |
| P(1)–N(2)–Ce        | 96.81(10)  | C(27)–C(32)–C(31) | 120.0(4) |
| Si(2)–N(2)–Ce       | 127.99(12) | O(1)–C(41)–C(42)  | 105.7(4) |
| P(2)–N(3)–Si(3)     | 129.65(14) | C(41)–C(42)–C(43) | 106.7(4) |
| P(2)–N(3)–Ce        | 94.90(10)  | C(42)–C(43)–C(44) | 105.0(3) |
| O(1)–C(44)–C(43)    | 105.8(3)   | C(41)–O(1)–Li     | 123.0(3) |
| O(2)–C(45)–C(46)    | 106.8(4)   | C(44)–O(1)–Li     | 125.6(3) |
| C(45)–C(46)–C(47)   | 107.7(4)   | C(45)–O(2)–C(48)  | 109.1(3) |
| C(48)–C(47)–C(46)   | 104.3(4)   | C(45)–O(2)–Li     | 127.7(3) |
| O(2)–C(48)–C(47)    | 106.9(3)   | C(48)–O(2)–Li     | 123.2(3) |
| C(41)–O(1)–C(44)    | 107.2(3)   |                   |          |
